CORRECTION

# Correction: The ABC's of Suicide Risk Assessment: Applying a Tripartite Approach to Individual Evaluations

The *PLOS ONE* Staff

The affiliation for the fifth author is not correct. Christopher H. Willcox is not affiliated with #6 but with #3 School of Psychology, University of Newcastle, Newcastle, NSW, Australia. The publisher apologizes for the error.

The Corresponding Author email is not correct. The correct email address is: [KHarris@psy.uq.edu](mailto:KHarris@psy.uq.edu).

## Reference

1. Harris KM, Syu J-J, Lello OD, Chew YLE, Willcox CH, Ho RHM (2015) The ABC's of Suicide Risk Assessment: Applying a Tripartite Approach to Individual Evaluations. *PLoS ONE* 10(6): e0127442. doi:[10.1371/journal.pone.0127442](https://doi.org/10.1371/journal.pone.0127442) PMID: [26030590](https://pubmed.ncbi.nlm.nih.gov/26030590/)

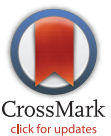

## OPEN ACCESS

**Citation:** The *PLOS ONE* Staff (2015) Correction: The ABC's of Suicide Risk Assessment: Applying a Tripartite Approach to Individual Evaluations. *PLoS ONE* 10(7): e0133223. doi:[10.1371/journal.pone.0133223](https://doi.org/10.1371/journal.pone.0133223)

**Published:** July 14, 2015

**Copyright:** © 2015 The PLOS ONE Staff. This is an open access article distributed under the terms of the [Creative Commons Attribution License](https://creativecommons.org/licenses/by/4.0/), which permits unrestricted use, distribution, and reproduction in any medium, provided the original author and source are credited.
